# Supplementary material for: A new role for the architecture of microvillar actin bundles in apical retention of membrane proteins
Source: PubMed Central journal article supplement — Mol Biol Cell. 2012 Jan 15;23(2):324–36. doi: 10.1091/mbc.E11-09-0765 (PMC3258176; doi:10.1091/mbc.e11-09-0765), 2012-01-15
Supplement: supp_E11-09-0765_CombinedSupMats2.pdf [file supp_E11-09-0765_CombinedSupMats2.pdf]

**Figure S1**

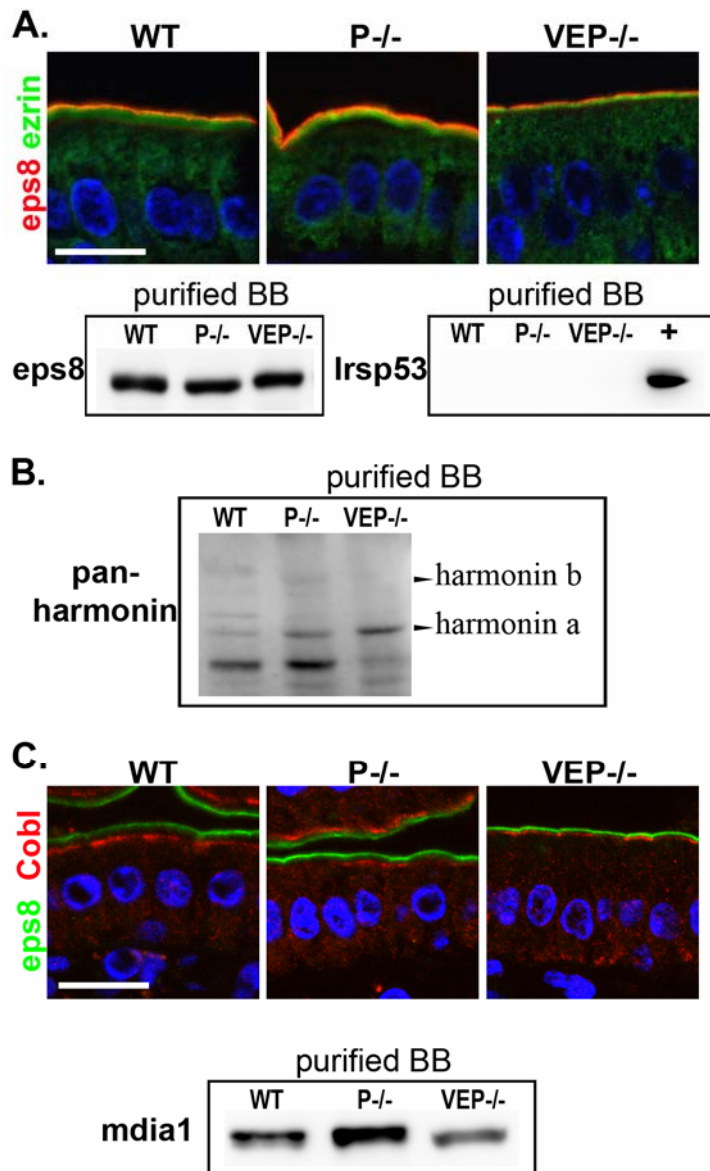

**Supplementary figure 1**

**Distribution of potential actors of microvilli morphogenesis identified by proteomics analysis**

Immunostainings and western blots on WT, P<sup>-/-</sup> and VEP<sup>-/-</sup> samples. **A-** Eps8 localisation at the tips of microvilli analysed by immunostainings and counterstained for the microvillus protein ezrin (top). Scale bar 10 μm. Detection of Eps8 and IRSp53 by immunoblots performed on isolated brush border lysates loaded for equal protein content (bottom). For IRSp53, a lysate of caco-2 cells has been used as positive control (+). **B-** Immunoblots using a pan-harmonin antibody performed on isolated brush border lysates. The expected sizes of isoforms a and b are highlighted. **C-** Analysis of the nucleators of parallel actin networks detected by mass spectrometry in WT, P<sup>-/-</sup> and VEP<sup>-/-</sup> enterocytes. Immunostainings for cordon-bleu (Cobl) counterstained with Eps8 to identify microvilli tips (top) show a terminal web localisation of the nucleator in all samples. Scale bar 10 μm. Immunoblots against mDia1 performed on isolated brush border lysates loaded for equal protein content (bottom) confirming its presence in the brush borders of the 3 samples.

**Figure S2**

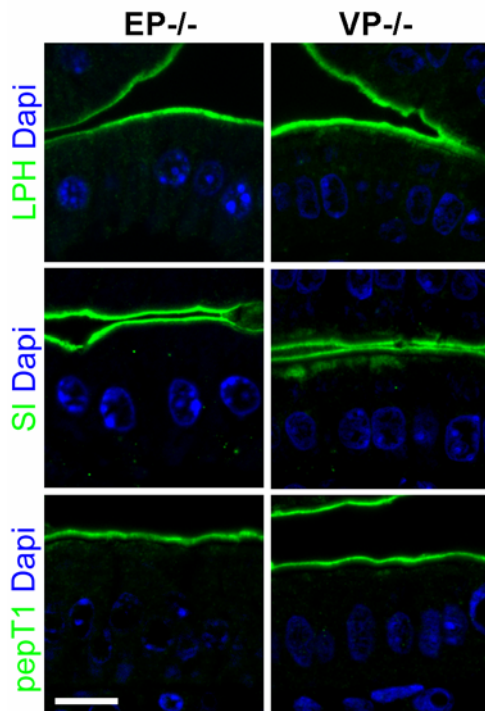

**Supplementary figure 2**

**Apical enzyme localisation in EP-/- and VP-/- enterocytes**

Immunostainings against the apical enzymes LPH, SI and PepT1 (green) on espin/plastin-1 (EP-/-) and villin/plastin-1 (VP-/-) samples. Dapi (blue) labels nuclei. Scale bar 10 $\mu$ m.

**Figure S3**

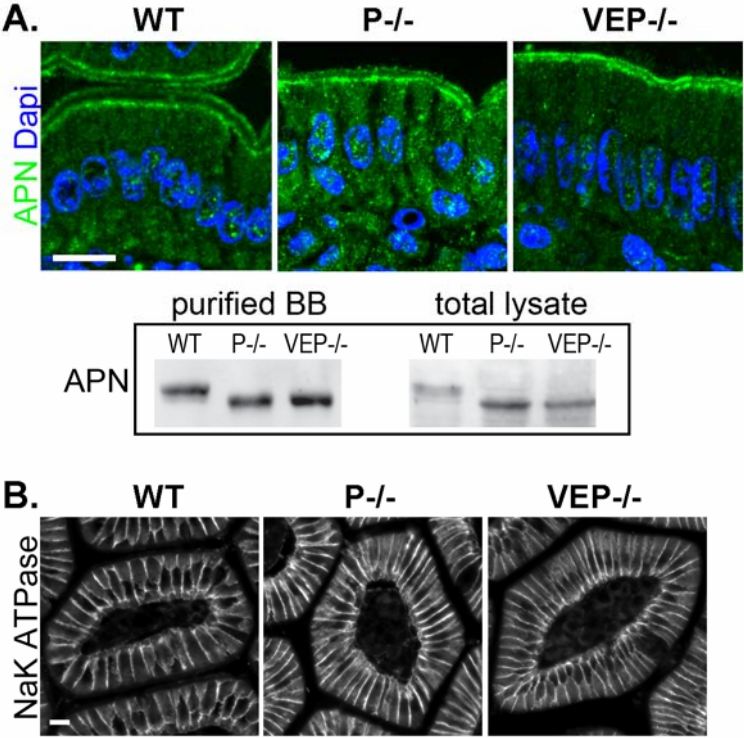

**Supplementary figure 3**  
**Not all polarity markers are affected in VEP-/- mice**

**A-** Western blots and immunostainings against the apical enzyme aminopeptidase N (APN, green) on WT, P-/- and VEP-/- samples. Dapi labels nuclei (blue). Immunoblots are performed on total and isolated brush border lysates. **B-** Immunostainings for the basolateral pump Na<sup>+</sup>/K<sup>+</sup> ATPase. Scale bars 10 μm.

**Figure S4**

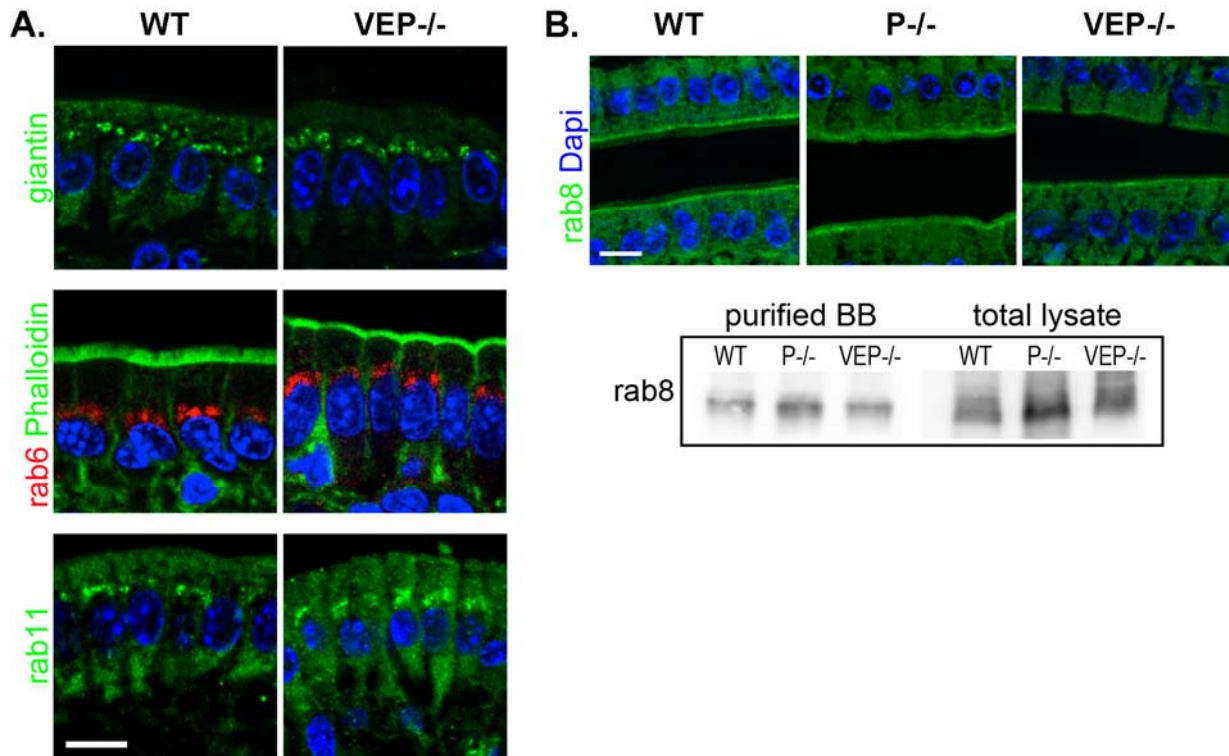

**Supplementary figure 4**  
**Unaffected apical trafficking markers in VEP-/- mice**

**A-** Immunostainings for the Golgi marker giantin, for Rab6, a GTPase involved in intracellular transport at the level of the Golgi and for Rab11, a GTPase involved in apical recycling. **B-** Immunostainings and Western blots against the GTPase Rab8 on WT, P-/- and VEP-/- samples. Western blots are performed on total and isolated brush border lysates. Dapi labels nuclei (blue). Scale bars 10 μm.

## Figure S5

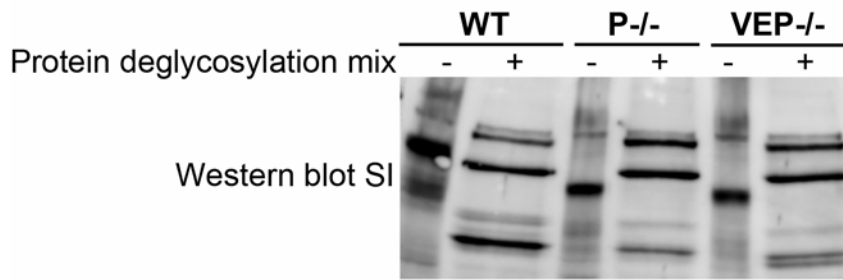

### Supplementary figure 5

#### Altered glycosylation pattern of digestive hydrolases in P<sup>-/-</sup> and VEP<sup>-/-</sup> enterocytes

Immunoblot against sucrase-isomaltase (SI) performed on enterocyte total lysate from WT, P<sup>-/-</sup> and VEP<sup>-/-</sup> mice treated or not with a Protein Deglycosylation Mix (NEB).

**Figure S6**

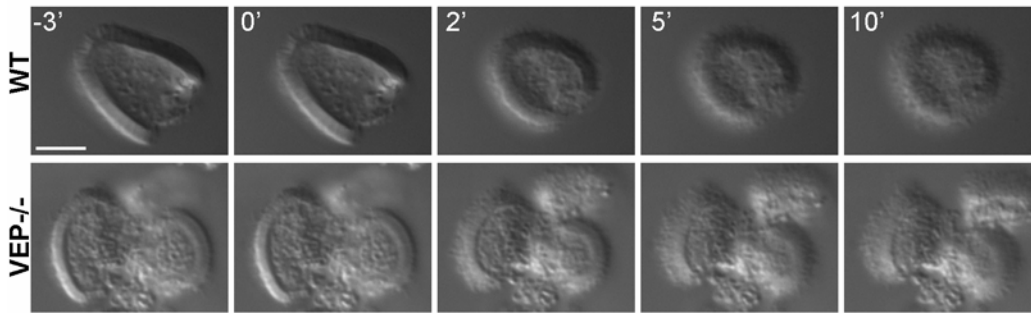

**Supplementary figure 6**

**Vesicular membrane extrusion is preserved in brush borders of VEP-/- mice**

DIC time-lapse series of WT and VEP-/- isolated brush borders before (-3') and after (0 to 10') addition of 200 $\mu$ M ATP showing the apical shedding of vesicles in both conditions. Bar 5 $\mu$ m.

**Table S1: Actin binding proteins identified in WT isolated brush borders**

| Identifier           | Description                                        | Matching peptides | MW    | Coverage |
|----------------------|----------------------------------------------------|-------------------|-------|----------|
| <b>Bundling</b>      |                                                    |                   |       |          |
| gi 85986577          | Plastin 1                                          | 43                | 70.4  | 46.5     |
| gi 148667910         | Villin 1                                           | 38                | 92.9  | 42.6     |
| gi 46877084          | Espin isoform 6                                    | 5                 | 28.1  | 28.9     |
| <b>Cross linking</b> |                                                    |                   |       |          |
| gi 11230802          | Actinin alpha 4                                    | 43                | 105   | 43.9     |
| gi 61097906          | Actinin alpha 1                                    | 16                | 103.1 | 20.7     |
| gi 7304855           | Actinin alpha 3                                    | 6                 | 103   | 8.3      |
| gi 38257404          | Filamin B                                          | 14                | 277.8 | 8.3      |
| gi 38257560          | Filamin A                                          | 5                 | 281.2 | 2.8      |
| <b>Capping</b>       |                                                    |                   |       |          |
| gi 2833214           | Eps8, EGF receptor kinase substrate 8              | 14                | 91.7  | 26.1     |
| gi 83649737          | Capping protein, muscle Z-line, beta isoform a     | 7                 | 31.3  | 26       |
| gi 6671672           | Capping protein, muscle Z-line, alpha 2            | 5                 | 33    | 25.5     |
| gi 161086971         | F-actin capping protein alpha-1 subunit            | 5                 | 33    | 25.5     |
| <b>Nucleation</b>    |                                                    |                   |       |          |
| gi 23956222          | ARP3 actin-related protein 3 homolog               | 7                 | 47.4  | 18.4     |
| gi 148708705         | Cordon-bleu, isoform CRA_b                         | 4                 | 146   | 3.5      |
| gi 6681183           | Diaphanous homolog 1                               | 2                 | 139.3 | 2.2      |
| <b>Myosins</b>       |                                                    |                   |       |          |
| gi 71151983          | Myosin heavy chain 14, NMHC II-C                   | 151               | 228.6 | 54       |
| gi 124487037         | Myosin IA                                          | 54                | 118.7 | 37.8     |
| gi 114326446         | Myosin, heavy polypeptide 9, non-muscle isoform 1  | 51                | 226.4 | 27.3     |
| gi 148694488         | Myosin-VI                                          | 26                | 146.3 | 22.9     |
| gi 148664634         | Myosin VIIb, isoform CRA_b                         | 22                | 241   | 11.8     |
| gi 118026911         | Myosin ID                                          | 19                | 116.1 | 18.4     |
| gi 50510675          | Myosin-11 isoform                                  | 18                | 228.3 | 9.1      |
| gi 123262062         | Myosin XVB                                         | 13                | 258.7 | 7.5      |
| gi 17986258          | Myosin light chain 6, smooth muscle and non-muscle | 12                | 16.9  | 57       |
| gi 13432181          | Myosin-Ib                                          | 8                 | 128.5 | 7        |
| gi 148677575         | Myosin Vb, isoform CRA_a                           | 7                 | 213.4 | 4        |
| gi 56205559          | Myosin, heavy polypeptide 10, non muscle           | 6                 | 232.5 | 2.5      |
| gi 15809016          | Myosin regulatory light chain MRCL2                | 5                 | 19.8  | 35.5     |
| gi 124494242         | Myosin IC isoform a                                | 5                 | 119.9 | 6.2      |
| gi 125987842         | Myosin-XVIIIa                                      | 6                 | 232.8 | 5.4      |
| gi 30410852          | Myosin IE                                          | 5                 | 126.8 | 5.3      |
| <b>Others</b>        |                                                    |                   |       |          |
| gi 40849928          | Plectin 1 isoform 11                               | 112               | 517.3 | 28       |
| gi 50881             | Ezrin                                              | 17                | 69.3  | 30.9     |
| gi 149251314         | Cingulin                                           | 16                | 149.5 | 20.8     |
| gi 41281802          | Harmonin                                           | 10                | 102.3 | 15.1     |
| gi 122890249         | Coronin, actin binding protein 2A                  | 8                 | 61.7  | 10.5     |
| gi 2851563           | Adseverin                                          | 8                 | 80.3  | 21.1     |
| gi 11127935          | Epithelial protein lost in neoplasm-b, eplin       | 8                 | 84.1  | 15.5     |
| gi 149751320         | Similar to tropomyosin 3 isoform 1                 | 5                 | 29    | 18.1     |
| gi 11528490          | Flightless I homolog                               | 6                 | 144.8 | 5.8      |
| gi 148669742         | Adducin 3, isoform CRA_c                           | 3                 | 83.5  | 5.5      |
| gi 148665000         | Dynamin 1-like, isoform CRA_c                      | 3                 | 83.3  | 3.9      |
| gi 149255823         | Similar to Cofilin 1                               | 2                 | 18.5  | 15.7     |

**Table S2: Proteins identified in VEP-/- but not in WT isolated brush borders**

| Identifier           | Description                                                  | Matching peptides | MW    | Cover-age |
|----------------------|--------------------------------------------------------------|-------------------|-------|-----------|
| <b>Actin binding</b> |                                                              |                   |       |           |
| gi 5031569           | ARP1 actin related protein 1 homolog A, centractin alpha     | 3                 | 42.6  | 12.8      |
| <b>Tra c</b>         |                                                              |                   |       |           |
| gi 148704358         | Adaptor protein complex AP-1, gamma 2 subunit, isoform CRA_a | 6                 | 91.9  | 9.2       |
| gi 48734610          | Sec31a protein                                               | 6                 | 98.2  | 9.5       |
| gi 67906177          | Sec23A                                                       | 6                 | 86.2  | 11.1      |
| gi 148669551         | Sec24 related gene family, member C, isoform CRA_a           | 4                 | 118.6 | 4.7       |
| gi 149254026         | Sec31 like 1                                                 | 4                 | 144.1 | 5.7       |
| gi 23956096          | USO1 homolog, vesicle docking protein                        | 3                 | 107   | 3.4       |
| gi 55670639          | Chain M, Ap1 Clathrin Adaptor Core                           | 3                 | 48.5  | 5.4       |
| <b>Junction</b>      |                                                              |                   |       |           |
| gi 148669535         | Vinculin, isoform CRA_b                                      | 5                 | 123.9 | 5         |
| gi 156255171         | Adducin 1 (alpha) isoform 1                                  | 4                 | 80.6  | 7.6       |
| <b>Others</b>        |                                                              |                   |       |           |
| gi 144922656         | Lethal giant larvae homolog 2                                | 3                 | 114.3 | 3.7       |
| gi 7106301           | Microtubule associated protein, RP/EB family, member1        | 3                 | 30    | 20.5      |



**Table S3: Proteins lost in VEP-/- compared to WT isolated brush borders**

| Identifier                     | Description                                           | Matching peptides | MW   | Coverage |
|--------------------------------|-------------------------------------------------------|-------------------|------|----------|
| <b>Actin bundling proteins</b> |                                                       |                   |      |          |
| gi 148667910                   | villin 1 Mus musculus                                 | 33                | 92.9 | 41.5     |
| gi 85986577                    | plastin 1, LOC102502 Mus musculus                     | 35                | 70.4 | 46.5     |
| gi 46877084                    | espin isoform 6 Mus musculus                          | 3                 | 28.1 | 20.2     |
| <b>Others</b>                  |                                                       |                   |      |          |
| gi 115704                      | RecName: Full=Catalase unspecified organism           | 8                 | 59.8 | 21.4     |
| gi 148699462                   | mCG12140, isoform CRA_a Mus musculus                  | 3                 | 8.3  | 31.9     |
| gi 148679891                   | mCG132388 Mus musculus                                | 3                 | 22.2 | 18.6     |
| gi 148686945                   | RIKEN cDNA 9030617O03, isoform CRA_b Mus              | 3                 | 74   | 5.7      |
| gi 148694085                   | calmodulin-like 4, isoform CRA_c Mus musculus         | 3                 | 20.4 | 6.2      |
| gi 6681727                     | sodium-glucose cotransporter 1 Mus musculus           | 3                 | 73.1 | 5.6      |
| gi 6755114                     | peroxiredoxin 5 precursor Mus musculus                | 3                 | 21.9 | 10.5     |
| gi 73622267                    | methylcrotonoyl-Coenzyme A carboxylase 2 ( $\beta$ )  | 3                 | 61.4 | 6.9      |
| gi 13385310                    | propionyl Coenzyme A carboxylase, $\beta$ polypeptide | 3                 | 58.4 | 7.4      |
| gi 148540106                   | methylmalonyl-Coenzyme A mutase Mus                   | 3                 | 82.8 | 6        |
| gi 15126777                    | carnitine O-octanoyltransferase Mus musculus          | 3                 | 70.2 | 8.2      |
| gi 145275168                   | glutathione peroxidase 2 Mus musculus                 | 3                 | 21.8 | 12.6     |

### **Tables S1, S2 and S3**

Tables show identifier (NCBI protein accession number), description (NCBI protein definition), matching peptides (number of peptides identified per experiment), MW (molecular weight in Daltons), coverage (% of sequence coverage identified from MS/MS data) of the proteins identified by mass spectrometry. Shown is the best experiment.
